1 **Association between the physical work environment and work functioning impairment while**  
2 **working from home under the COVID-19 pandemic in Japanese workers**

3

4 Makoto Okawara<sup>1</sup>, M.D., Tomohiro Ishimaru<sup>1</sup>, M.D., M.P.H., Ph.D., Seiichiro Tateishi<sup>2</sup>, M.D., Ph.D.,

5 Ayako Hino<sup>3</sup>, M.D., M.B.A., Ph.D., Mayumi Tsuji<sup>4</sup>, M.D., Ph.D., Kazunori Ikegami<sup>5</sup>, M.D., Ph.D.,

6 Masako Nagata<sup>6</sup>, M.D., Ph.D., Shinya Matsuda<sup>7</sup>, M.D., Ph.D., Yoshihisa Fujino<sup>1\*</sup>, M.D., M.P.H.,

7 Ph.D., for the CORoNaWork project

8

9 1 Department of Environmental Epidemiology, Institute of Industrial Ecological Sciences, University  
10 of Occupational and Environmental Health, Japan

11 2 Department of Occupational Medicine, School of Medicine, University of Occupational and  
12 Environmental Health, Japan

13 3 Department of Mental Health, Institute of Industrial Ecological Sciences, University of Occupational  
14 and Environmental Health, Japan

15 4 Department of Environmental Health, School of Medicine, University of Occupational and  
16 Environmental Health, Japan

17 5 Department of Work Systems and Health, Institute of Industrial Ecological Sciences, University of  
18 Occupational and Environmental Health, Japan

**NOTE: This preprint reports new research that has not been certified by peer review and should not be used to guide clinical practice.**

19 6 Department of Occupational Health Practice and Management, Institute of Industrial Ecological

20 Sciences, University of Occupational and Environmental Health, Japan

21 7 Department of Preventive Medicine and Community Health, School of Medicine, University of

22 Occupational and Environmental Health, Japan

23

24 \*Corresponding author

25 Yoshihisa Fujino, M.D., M.P.H., Ph.D.

26 Department of Environmental Epidemiology, Institute of Industrial Ecological Sciences, University of

27 Occupational and Environmental Health, Japan

28 1-1, Iseigaoka, Yahatanishiku, Kitakyushu, 807-8555, Japan

29 Tel: +81-93-691-7401

30 E-mail: [zenq@med.uoeh-u.ac.jp](mailto:zenq@med.uoeh-u.ac.jp)

31

32 **Abstract**

33 **Objective:** This study examined the relationship between the physical work environment and work  
34 functioning impairment while working from home in the context of rapid changes associated with the  
35 COVID-19 pandemic.

36 **Methods:** This cross-sectional study of internet monitors was conducted between December 22 and  
37 26, 2020. Of a total of 33,302 participants, 5,760 who worked from home at least 1 day a month,  
38 excluding those who met the exclusion criteria, were included in the analysis. A binary subjective  
39 assessment of the physical work environment while working from home was used as an exposure  
40 factor. We examined 9 items related to the physical work environment, including level of illuminance  
41 and use of suitable desks and chairs, traditionally recommended for health and safety management  
42 when working at a desk. The number of non-conformities to 7 items was also used as an exposure  
43 factor. The presence of severe work functioning impairment was measured using the Work Functioning  
44 impairment Scale (WFun), a self-reported outcome measure of the degree of work functioning  
45 impairment. Odds ratios of severe work functioning impairment were estimated using mixed-effects  
46 logistic regression analysis with the prefecture of residence as a random effect.

47 **Results:** Multivariate analysis showed that the odds ratio of severe work functioning impairment was  
48 significantly higher among those who indicated “No” to all recommended items except for “I work at  
49 a desk/chair for office use.” The highest odds ratio of work functioning impairment was associated

50 with a “No” response to “There is enough light to do my work” (aOR: 2.02, 95%CI: 1.73–2.35,  
51  $p<0.01$ ). Our results also suggest the presence of a dose-response relationship between the number of  
52 non-conformities to recommendations for work environments while working from home and work  
53 functioning impairment.

54 **Conclusions:** Our findings suggest that it is important for both companies and individual workers to  
55 create a work environment that prevents negative health outcomes and improves productivity while  
56 working from home.

57 **Keywords: Environment and Public Health, workplace, Posture, presenteeism, Work**  
58 **Performance, COVID-19**

59

60 **Introduction**

61           The expansion of telecommuting brought about by the COVID-19 pandemic is one of the  
62 most marked changes to the way people work around the world in decades. In February 2020, the  
63 Japanese government issued a basic policy describing countermeasures against COVID-19, in which  
64 it included a recommendation for companies to implement telework to prevent the spread of infection  
65 (1). Furthermore, as the disease continued to spread throughout Japan, the government declared a state  
66 of emergency in April 2020, requesting people to refrain from going out, and further promoting  
67 telework (2). As a result, the number of companies adopting telecommuting and the percentage of  
68 workers working from home have increased rapidly (3). Further, even after the state of emergency  
69 ended, more and more companies continued to employ coronavirus countermeasures, mixing going to  
70 work and working from home, based on the situation in each region (4).

71           Due to the unexpected emergence of COVID-19, neither companies nor workers were able  
72 to sufficiently prepare their home environments for conducting work. While work-from-home systems  
73 had been discussed as a way to counter overwork and promote work-life balance in Japan, few  
74 effective efforts had been made (5). However, with the COVID-19 pandemic, companies were forced  
75 to rapidly adopt telework at the request of the national and local governments. As a result, many  
76 workers have had to work from home in environments that are not fully equipped with the necessary  
77 systems or facilities, and that are suboptimal for work execution. In 2019, about 20% of companies in

78 Japan had adopted telework. In contrast, in March 2020, 24% of companies in Tokyo had adopted  
79 telework, jumping to about 57% in January 2021 (4,6).

80 Working from home is expected to have an impact on workers' health and work productivity.  
81 Working in environments that are not properly designed and working with poor posture can affect the  
82 musculoskeletal system (7,8,9). In addition, there are concerns that individuals are working longer due  
83 to insufficient management of working hours. Further, reduced opportunities for direct communication  
84 can make it difficult for individuals to receive support from superiors and colleagues, and for managers  
85 to manage the situation. These factors have been linked to feelings of loneliness, isolation, and  
86 depressed mood (10,11,12).

87 Workers' physical work environment while working from home is important for their health  
88 and work productivity. There are several basic recommendations for the working-from-home  
89 environment: have enough space to work; control the illumination of text, keyboard surfaces, and  
90 displays; prevent glare from displays; provide windows and other ventilation equipment; maintain a  
91 constant temperature and humidity in the room; reduce noise; and prepare necessary equipment,  
92 including desks and chairs, to enable a good work posture and provide an effective workspace  
93 (13,14,15).

94 However, because working from home has rapidly become the new way of working in Japan during  
95 the COVID-19 pandemic, it is not known how the physical work environment while working from

96 home affects worker's health and productivity. In fact, many companies have no control over workers'  
97 work environment while they are working from home. A previous survey reported that, of the 1,256  
98 companies in Japan that had introduced telework, 75.8% indicated that they did not check any  
99 components of workers' physical work environment, such as air conditioning, lighting, and desk and  
100 chair condition, while they were working from home (16). Working from home in an environment that  
101 is not properly maintained can cause work functioning impairment through worker's health problems.

102 The purpose of this study was to investigate the relationship between the physical work  
103 environment while working from home and work functioning impairment in the context of rapid  
104 changes associated with the COVID-19 pandemic.

105

106     **Methods**

107             This cross-sectional study was conducted using data from the baseline survey of the  
108 Collaborative Online Research on the Novel-coronavirus and Work (CORoNaWork) Project, a  
109 prospective cohort study that used a questionnaire survey of Internet monitors to investigate the health  
110 of workers during the COVID-19 pandemic (17). This study was conducted with the approval of the  
111 Ethics Committee of the University of Occupational and Environmental Health, Japan (Approval No.  
112 R2-079).

113             The survey was conducted between December 22 and 26, 2020. A total of 33,302 workers  
114 between the ages of 20 and 65 years at the time of the survey were included, and sampling was  
115 designed such that participants' sex and occupation (office workers and non-office workers) were  
116 balanced by region of residence, based on the cumulative infection rate of COVID-19. Excluding those  
117 who were deemed to have provided inappropriate responses, the total number of participants in this  
118 study was 27,036. Details of the exclusion criteria are described in the protocol (17). Briefly, we  
119 excluded those who had extremely short response times, were shorter than 140 cm tall, weighed less  
120 than 30 kg, or provided inconsistent responses to multiple identical questions. In this study, workers  
121 who were working from home at least 1 day a month were included in the analysis.

122

123     Assessment of physical work environment while working from home



124           A binary subjective assessment of the physical work environment while working from home  
125 was used as an exposure factor. The following nine items were examined: “There is a place/room  
126 where I can concentrate,” “There is enough light to do my work,” “There is enough space on my desk  
127 to work,” “There is enough space at my feet,” “The temperature and humidity in the room are  
128 comfortable,” “The environment is quiet,” “I work at a desk/chair for office use,” “I work at a  
129 desk/chair not for office use,” “I work at a coffee table or kotatsu.” We included the final item “I work  
130 at a coffee table or kotatsu” because sitting on the floor at a low table such as a coffee table or kotatsu  
131 (a low table equipped with a heater) to eat or do light work is a common way of life in Japan.

132           Additionally, we examined the number of non-conformities to seven of the nine  
133 recommended items for work environments; we excluded “I work at a desk/chair for office use” and  
134 combined responses to the items “I work at a desk/chair not for office use” and “I work at a  
135 table/kotatsu.” Thus, non-conformity was indicated by “No” responses to the following items: “There  
136 is a place/room where I can concentrate,” “There is enough light to do my work,” “There is enough  
137 space on my desk to work,” “There is enough space at my feet,” “The temperature and humidity in the  
138 room are comfortable,” “The environment is quiet,” and “I work at a desk/chair not for office use” or  
139 “I work at a coffee table or kotatsu.” The number of non-conformities was stratified into five categories  
140 (0 items, 1-2 items, 3-4 items, 5-6 items, and 7 items) and used as an exposure factor.

141           Assessment of work functioning impairment and other covariates

142           The presence or absence of severe work functioning impairment was measured using the  
143   Work Functioning impairment Scale (WFun) and used as the primary outcome. WFun is a self-reported  
144   outcome measure of the degree of work functioning impairment developed based on the Rasch model  
145   and validated according to Consensus-based Standards for the selection of health Measurement  
146   Instruments (COSMIN) (18). Subjects provide responses to a total of seven items, including “I haven’t  
147   been able to behave socially” and “I have felt that my work isn’t going well,” on a five-point scale,  
148   and the total score indicates the degree of work functioning impairment. The total score ranges from  
149   7 to 35, and a score of 21 or higher is defined as severe work functioning impairment based on the  
150   results of interviews with occupational health nurses in a previous study (19). While the original WFun  
151   contains seven items, we used a six-item version, from which the scores can be equivalently converted  
152   to those of the original version based on the Rasch model.

153           For socioeconomic factors, we examined the following items: sex, age, education (junior  
154   high school; high school; vocational school, junior college, or technical college; university or graduate  
155   school), marital status (married; divorced/bereaved; never married), job type (mainly desk work; Jobs  
156   mainly involving interpersonal communication; mainly physical work), equivalent income (household  
157   income divided by the square root of household size), company size (total number of employees in the  
158   company where the respondent mainly works [self-employed answered one]).

159           For work-related factors, we examined the following items: frequency of working from

160 home (at least 4 days a week; at least 2 days a week; at least 1 day a week; at least 1 day a month;  
161 hardly ever), change in working hours compared to pre-2019 (increased; no change; decreased), one-  
162 way commute time.

163 As the community-level factor, we used the cumulative incidence of COVID-19 infection  
164 in the prefecture of residence one month before the survey. Data were collected from the websites of  
165 public institutions.

166

167 Statistical analysis

168 Age and WFun scores are presented as continuous variables using median and interquartile  
169 range (IQR). Other variables are presented as categorical variables using percentages. We conducted  
170 mixed-effects logistic regression analysis using the presence or absence of severe work functioning  
171 impairment as the dependent variable and subjective evaluation of the physical work environment or  
172 the number of non-conformities to the recommendations for work environments while working at  
173 home as independent variables, with the prefecture of residence as the random effect. To adjust for  
174 potential confounders, we used sex, age, education, job type, equivalent income, company size,  
175 frequency of working from home, change in working hours compared with pre-2019, one-way  
176 commute time, and cumulative infection rate by prefecture as covariates.

177 All statistical analyses were conducted using Stata (Stata Statistical Software: Release 14.2;

178 StataCorp LLC, TX, USA). A  $p$ -value less than 0.05 was considered statistically significant.

179

180 **Results**

181 Of a total of 33,302 responses, 6,266 cases were excluded: 215 cases were judged to have  
182 provided fraudulent responses by the company in charge of conducting the survey, and 6,051 cases  
183 met the exclusion criteria after tabulation. Of the remaining 27,036 cases, respondents who met the  
184 inclusion criteria (those worked from home at least 1 day a month) were selected, providing 5,760  
185 cases for analysis. A flowchart showing the inclusion and exclusion of participants is shown in Figure  
186 1.

187 [Insert Figure 1. here]

188 The demographic and sociological characteristics of the analyzed population are shown in  
189 Table 1. A total 3,361 (58%) were male and the median age was 50 years (IQR: 42–57). Of the total  
190 population, 4,052 (70%) were desk workers and 2,790 (48%) telecommuted four or more days per  
191 week. The overall median WFun score was 12 (IQR: 7–20) and severe work functioning impairment  
192 ( $WFun \geq 21$ ) was observed in 1,309 workers (23%). There were no missing data because the survey  
193 was designed such that all responses were mandatory.

194 [Insert Table 1. here]

195 The associations of severe work functioning impairment with workers' physical work  
196 environment while working from home are shown in Table 2. There was no significant association of  
197 severe work functioning impairment with the item "I work at a desk/chair for office use" (adjusted

198 odds ratio [OR]: 0.93, 95% CI: 0.82–1.06,  $p=0.27$ ). For all other items, the OR of severe work  
199 functioning impairment was significantly higher among those who worked from home in an  
200 unfavorable work environment. The highest OR of work functioning impairment was for a “No”  
201 response to “There is enough light to do my work” (aOR: 2.02, 95%CI: 1.73–2.35,  $p<0.01$ ). The results  
202 of Model 1, which was adjusted only for sex and age, and Model 2, which was adjusted for other  
203 potential confounders, were in a similar direction.

204 [Insert Table 2. here]

205 Table 3 shows the relationship between severe work functioning impairment and the number  
206 of non-conformities (out of seven) to recommendations for work environments. From the nine items  
207 in Table 2, we excluded “I work at a desk/chair for office use” and combined responses to the items “I  
208 work at a desk/chair not for office use” and “I work at a table/kotatsu.” When we used those who  
209 indicated no non-conformities to recommendations for work environments as the reference group, the  
210 OR of severe work functioning impairment was significantly higher for any non-conformity to the  
211 seven items examined. Moreover, an increase in the number of non-conformities was correlated with  
212 an increase in the OR of severe work functioning impairment, with non-conformities to all seven items  
213 associated with the highest risk (aOR: 4.51, 95% CI: 2.86–7.11,  $p<0.01$ ). The results of Model 1,  
214 which was adjusted only for sex and age, and Model 2, which was adjusted for other potential  
215 confounders, were in a similar direction.

216 [Insert Table 3. here]

217

218 **Discussion**

219           To our knowledge, this is the first study to identify an association between the physical work  
220 environment while working from home and work functioning impairment. We found that non-  
221 conformity to any of the recommendations for work environments examined in this study, except for  
222 “I work at a desk/chair for office use,” was associated with work functioning impairment. Additionally,  
223 there was a dose-response relationship between the number of non-conformities to recommendations  
224 for work environments and risk of work functioning impairment.

225           We found that non-conformity to any of the recommendations for work environments while  
226 working from home examined in this study, except for “I work at a desk/chair for office use,” was  
227 associated with work functioning impairment. The work environment items examined in this study are  
228 traditionally recommended for health and safety management when working at a desk (13,14,15).  
229 These included items related to the quality of the surrounds, such as temperature, humidity, and  
230 quietness of the workplace; those linked to back pain, stiff shoulders, and musculoskeletal strain; and  
231 those for concentration and performance. Comfortable temperature and humidity are expected to  
232 improve workers’ concentration and performance. In addition, items related to work posture, such as  
233 the choice of a desk and chair suitable for work and space on the desk and at the feet, are thought to  
234 reduce musculoskeletal strain during work. In addition, managing proper work posture, temperature,  
235 humidity, and illumination will help prevent visual display terminals syndrome. Setting up these



236 environments is expected to help prevent or reduce health problems and reduce work functioning  
237 impairment while working from home.

238           Furthermore, our findings suggest that there is a dose-response relationship between the  
239 number of non-conformities to recommendations for work environments while working from home  
240 and work functioning impairment. In other words, no one specific item among the seven items  
241 examined in this study had a positive impact on productivity; rather, adapting as much of the work  
242 environment as possible to recommendations for work environments while working from home had  
243 an increasingly positive impact on productivity. Interestingly, only 20% of workers indicated that they  
244 conformed to all seven items examined in this study, suggesting the difficulty of creating an optimal  
245 work environment while working from home. For example, purchasing and installing new desks and  
246 chairs suitable for working from home can be a financial burden and a housing space problem. Further,  
247 adequate management of room temperature and humidity is linked to issues such as insulation of the  
248 dwelling and the purchase and electricity costs of air conditioning. Based on the results of a previous  
249 survey and our present findings, we can infer that the methods and systems for checking and improving  
250 the working environment while work from home are still lacking and that they are not being managed  
251 within companies (16). To increase productivity when working from home, both companies and  
252 workers need to account for each of these individual items when creating a work environment to ensure  
253 that as many items conform to the recommendations as possible.

254           There is currently no consistent evidence on the impact of working from home on the health  
255   and productivity of workers, as it varies depending on the worker's situation (20). While working from  
256   home has its advantages, including improved work-life balance and reduced burden of commuting, it  
257   also has disadvantages, including the psychological burden of a lack of separation between living and  
258   working spaces and time, and the lack of communication with colleagues. Furthermore, as shown in  
259   this study, the impact of various aspects of the physical work environment while working from home  
260   can be significant. In fact, the number of conformities to recommendations for work environments  
261   examined in this study varied among workers. Therefore, to understand the impact of working from  
262   home on the health and productivity of workers, it is necessary to continue to study differences in the  
263   physical work environment among individuals conducting work from home.

264           Working from home has been suggested to be associated with sickness presenteeism, a  
265   condition in which individuals work while experiencing health problems. For example, the use of  
266   properly designed desks and chairs can affect the health of workers with musculoskeletal disorders  
267   and chronic pain, important problems that cause sickness presenteeism (21,22). Further, a study has  
268   suggested that removing barriers to work, such as commuting and going to the office, is also associated  
269   with the occurrence of sickness presenteeism (23). Improving workers' work environment while  
270   working from home is important for reducing the negative health outcomes associated with working  
271   from home, improving presenteeism, and increasing productivity. Many companies and workers who

272 have never had experience working from home are now suddenly being forced to do so, without  
273 appropriate preparation. As the need to telework continues, the associated risks to health and  
274 presenteeism may become more apparent, indicating the need for urgent measures to improve the work  
275 environment for those working from home.

276           This study has several limitations. First, selection bias was unavoidable because the study  
277 was a survey of Internet monitors. To reduce potential bias, recruitment was conducted by sampling  
278 by occupation and gender in each region according to the infection rate. To understand the  
279 characteristics of the participants in this study, we compared our findings with those from national and  
280 occupational surveys that use various batteries (17). A previous study that used WFun to examine  
281 33,985 workers from a general company showed that 20% had severe work functioning impairment  
282 (24). Given that our study protocol found that 21% of the entire study population has severe work  
283 functioning impairment (17), we concluded that our present study population was relatively unbiased.

284           Second, we relied on respondents' self-assessment of their physical environment while  
285 working from home, but did not examine the actual physical environments. Therefore, there may be  
286 discrepancies with objective evaluation. However, because we inquired about the physical  
287 environment, the possibility of erroneous answers is low.

288           Third, since this study was a cross-sectional study, it is impossible to determine the causal  
289 relationship between the exposure factors and outcome. However, we think it is unlikely that

290 individuals with severe work functioning impairment would choose to create a poor working  
291 environment. For example, a person with back pain is unlikely to actively choose a small space or an  
292 ill-fitting desk environment. Therefore, there is little possibility of reverse causality.

293 Finally, in addition to the exposure factors examined in this study, there may be other  
294 environmental factors that can affect health and productivity while working from home. Some  
295 examples are living with a family member who needs care, inadequate telecommunication speed, and  
296 reduced physical activity.

297 In conclusion, individuals who work in poor work environments while working from home  
298 may exhibit work functioning impairment during a period of rapid change owing to the COVID-19  
299 pandemic. As work environments become more diverse, it is important for both companies and  
300 individual workers to create a work environment that prevents negative health outcomes and improves  
301 productivity while working from home.

302

303

304 **References**

- 305 1. Decisions by the Headquarters for Novel Coronavirus Disease Control. Basic Policies for Novel  
306 Coronavirus Disease Control. February 25, 2020. [cited January 18, 2021]. Available from:  
307 <https://www.mhlw.go.jp/content/10200000/000603610.pdf>
- 308 2. Decisions by the Headquarters for Novel Coronavirus Disease Control. Basic Policies for Novel  
309 Coronavirus Disease Control (Revised on April 7,2020). April 7, 2020. [cited January 18, 2021].  
310 Available from: <https://www.mhlw.go.jp/content/10900000/000620733.pdf>
- 311 3. Tokyo Metropolitan Government. [Results of an emergency survey on telework adoption rates].  
312 May 11, 2020. [cited January 18, 2021]. Available from:  
313 <https://www.metro.tokyo.lg.jp/tosei/hodohappyo/press/2020/05/12/10.html>
- 314 4. Tokyo Metropolitan Government. [Results of a survey on telework adoption rates]. January 22,  
315 2021. [cited February 23, 2021]. Available from:  
316 <https://www.metro.tokyo.lg.jp/tosei/hodohappyo/press/2021/01/22/17.html>
- 317 5.Decisions by the Council for the Realization of Work Style Reform. Action Plan for the Realization  
318 of Work Style Reform. March 28, 2017. [cited January 18, 2021]. Available from:  
319 <https://www.kantei.go.jp/jp/headline/pdf/20170328/07.pdf>
- 320 6. Ministry of Internal Affairs and Communications. [FY2019 Survey Report on Telecommunications  
321 Usage Trends (Corporate)]. August 17, 2020. [cited January 18, 2021]. Available from:

- 322 [https://www.soumu.go.jp/johotsusintokei/statistics/pdf/HR201900\\_002.pdf](https://www.soumu.go.jp/johotsusintokei/statistics/pdf/HR201900_002.pdf)
- 323 7. Skov T, Borg V, Orhede E. Psychosocial and physical risk factors for musculoskeletal disorders of  
324 the neck, shoulders, and lower back in salespeople. *Occupational and Environmental Medicine*. 1996;  
325 53:351-356.
- 326 8. Sang K, Gyi D, Haslam C. Musculoskeletal symptoms in pharmaceutical sales representatives.  
327 *Occupational Medicine*. 2010; 60:108-114.
- 328 9. Celik S, Celik K, Dirimese E, Taşdemir N, Arik T, Büyükkara İ. Determination of pain in  
329 musculoskeletal system reported by office workers and the pain risk factors. *Int J Occup Med Environ*  
330 *Health*. 2018; 31:91-111.
- 331 10. Mann S, Holdsworth L. The psychological impact of teleworking: stress, emotions and health.  
332 *New Technology, Work and Employment*. 2003; 18:196-211.
- 333 11. Montreuil S, Lippel K. Telework and occupational health: a Quebec empirical study and regulatory  
334 implications. *Safety Science*. 2003; 41:339-358.
- 335 12. Cohen S, Janicki-Deverts D, Miller GE. Psychological stress and disease. *JAMA - Journal of the*  
336 *American Medical Association*. 2007; 298:1685-1687.
- 337 13. Ministry of Health, Labour and Welfare. [Guidelines for the Appropriate Introduction and  
338 Implementation of Work Outside the Workplace Using Information and Communication Technology].  
339 February 22, 2018. [cited January 18, 2021]. Available from:

- 340 <https://www.mhlw.go.jp/content/000545678.pdf>
- 341 14. Ministry of Health, Labour and Welfare. [The Occupational Health Guidelines on Information  
342 Device Work at Office]. July 12, 2019. [cited January 18, 2021]. Available from:  
343 <https://www.mhlw.go.jp/content/000539604.pdf>
- 344 15. Ministry of Health, Labour and Welfare. [Ordinance on Health Standards in the Office]. September  
345 30, 1972. [cited January 18, 2021]. Available from: [https://www.jniosh.johas.go.jp/icpro/jicosh-](https://www.jniosh.johas.go.jp/icpro/jicosh-old/japanese/country/japan/laws/03_rel/12_office_reg/index.html)  
346 [old/japanese/country/japan/laws/03\\_rel/12\\_office\\_reg/index.html](https://www.jniosh.johas.go.jp/icpro/jicosh-old/japanese/country/japan/laws/03_rel/12_office_reg/index.html)
- 347 16. Mitsubishi UFJ Research and Consulting Co., Ltd. [FY2020 Comprehensive Fact-Finding  
348 Research Project on Labor Management for Teleworkers as a Ministry of Health, Labour and Welfare  
349 commissioned project: Fact-finding Survey on Labor Management of Teleworkers (Preliminary  
350 version)]. December 16, 2020. [cited January 18, 2021]. Available from:  
351 <https://www.mhlw.go.jp/content/11911500/000694957.pdf>
- 352 17. Fujino Y, Ishimaru T, Eguchi H, Tsuji M, Seichiro T, Ogami A, et al. Protocol for a nationwide  
353 Internet-based health survey in workers during the COVID-19 pandemic in 2020. *medRxiv*.  
354 2021:2021.2002.2002.21249309.
- 355 18. Fujino Y, Uehara M, Izumi H, Nagata T, Muramatsu K, Kubo T, et al. Development and validity  
356 of a work functioning impairment scale based on the Rasch model among Japanese workers. *J Occup*  
357 *Health*. 2015; 57:521–31.

- 358 19. Nagata T, Fujino Y, Saito K, Uehara M, Oyama I, Izumi H, et al. Diagnostic Accuracy of the Work  
359 Functioning Impairment Scale (WFun): A Method to Detect Workers Who Have Health Problems  
360 Affecting their Work and to Evaluate Fitness for Work. *J Occup Environ Med.* 2017; 59:557–562.
- 361 20. Oakman, J., Kinsman, N., Stuckey, R. et al. A rapid review of mental and physical health effects  
362 of working at home: how do we optimise health?. *BMC Public Health.* 2020; 20:1825.
- 363 21. Loeppke R, Taitel M, Haufle V, Parry T, Kessler RC, Jinnett K. Health and Productivity as a  
364 Business Strategy. *J Occup Environ Med.* 2009; 51:411–428.
- 365 22. Nagata T, Mori K, Ohtani M, Nagata M, Kajiki S, Fujino Y, et al. Total Health-Related Costs Due  
366 to Absenteeism, Presenteeism, and Medical and Pharmaceutical Expenses in Japanese Employers. *J*  
367 *Occup Environ Med.* 2018; 60:e273–e280.
- 368 23. Steidelmüller, Corinna PhD; Meyer, Sophie-Charlotte PhD; Müller, Grit PhD Home-Based  
369 Telework and Presenteeism Across Europe. *Journal of Occupational and Environmental Medicine.*  
370 2020; 62:998-1005.
- 371 24. Okawara M, Nagata T, Nagata M, Otani M, Mori K, et al. (2020) Association between the course  
372 of hypnotics treatment for insomnia and work functioning impairment in Japanese workers. *PLOS*  
373 *ONE.* 2020; 15: e0243635.



Figure 1. Flow chart of participants in the study

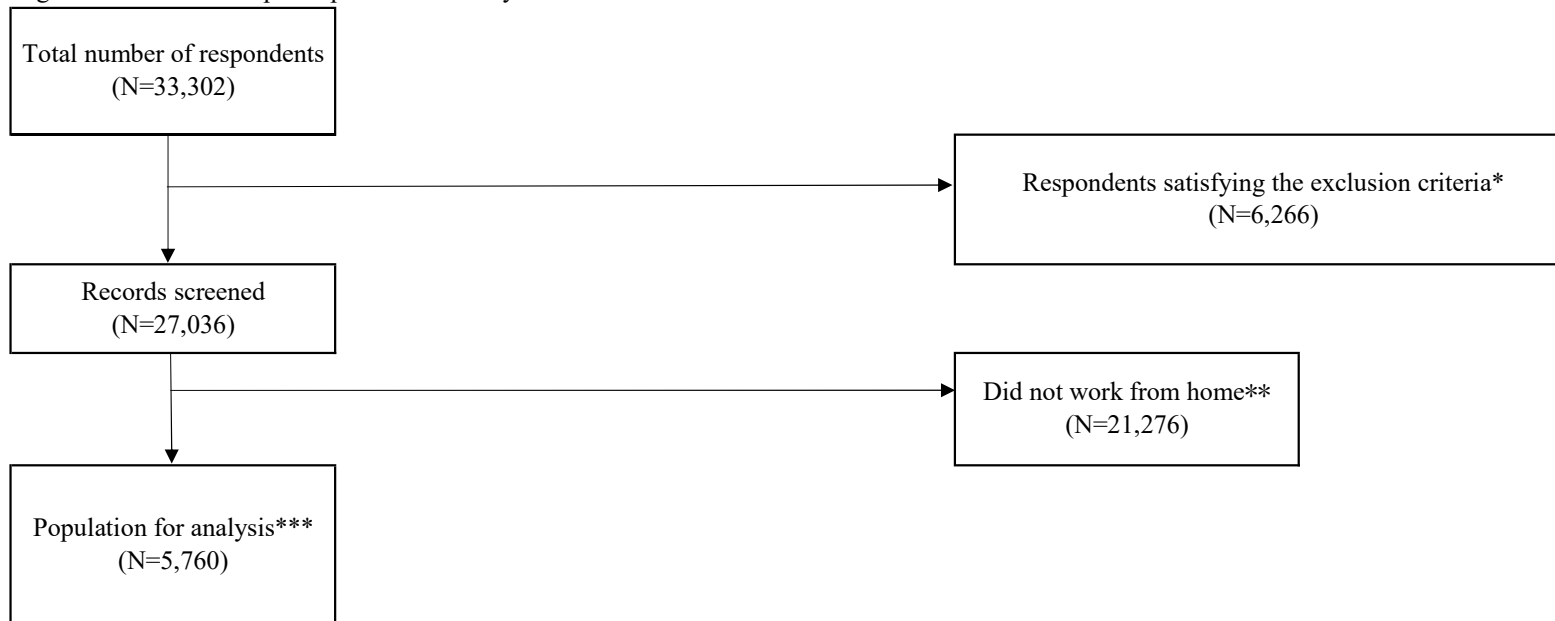

\*Respondents who had extremely short response times, were shorter than 140 cm tall, weighed less than 30 kg, or provided inconsistent responses to multiple identical questions.

\*\*Respondents who answered "hardly ever" to the question inquiring about the frequency of working from home

\*\*\* Respondents who work from home at least 1 day a month

Table 1. Participants' demographic and sociological characteristics

|                                                         | Total |                  |
|---------------------------------------------------------|-------|------------------|
|                                                         | n     | % or median(IQR) |
| Sex, male                                               | 3361  | 58%              |
| Age, years, median (IQR)                                |       | 50 (42-57)       |
| 20-29                                                   | 270   | 5%               |
| 30-39                                                   | 862   | 15%              |
| 40-49                                                   | 1567  | 27%              |
| 50-59                                                   | 2129  | 37%              |
| ≥60                                                     | 932   | 16%              |
| Education                                               |       |                  |
| Junior high school                                      | 50    | 1%               |
| High school                                             | 943   | 16%              |
| Vocational school, junior college, or technical college | 1132  | 20%              |
| University or graduate school                           | 3635  | 63%              |
| Marital status                                          |       |                  |
| Married                                                 | 3280  | 57%              |
| Divorced or bereaved                                    | 504   | 9%               |
| Never married                                           | 1976  | 34%              |
| Equivalent income (Japanese Yen)                        |       |                  |
| 550000-2500000                                          | 1310  | 23%              |
| 2500000-4250000                                         | 1465  | 25%              |
| 4250000-5500000                                         | 1514  | 26%              |
| >5500000                                                | 1471  | 26%              |
| Job type                                                |       |                  |
| Mainly desk work                                        | 4052  | 70%              |
| Jobs mainly involving interpersonal communication       | 1219  | 21%              |
| Mainly physical work                                    | 489   | 8%               |
| Number of employees                                     |       |                  |
| 1                                                       | 1518  | 26%              |
| 2-49                                                    | 1200  | 21%              |
| 50-999                                                  | 1304  | 23%              |
| 1000-9999                                               | 1076  | 19%              |
| ≥10000                                                  | 662   | 11%              |
| Frequency of working from home                          |       |                  |
| At least 1 day a month                                  | 615   | 11%              |
| At least 1 day a week                                   | 878   | 15%              |
| At least 2 days a week                                  | 1477  | 26%              |
| At least 4 days a week                                  | 2790  | 48%              |
| Time spent on one-way commute                           |       |                  |
| More than 2 hours                                       | 166   | 3%               |
| 1-2 hours                                               | 1041  | 18%              |
| 30 minutes to 1 hour                                    | 1392  | 24%              |
| Less than 30 minutes                                    | 1109  | 19%              |
| Very little                                             | 2052  | 36%              |
| Change in working hours compared to pre-2019            |       |                  |
| Increased                                               | 817   | 14%              |
| No change                                               | 4049  | 70%              |
| Decreased                                               | 894   | 16%              |
| WFun total score, median (IQR)                          |       | 12 (7-20)        |
| WFun≥21                                                 | 1309  | 23%              |

Table 2. Association between workers' physical work environment while working from home and severe work functioning impairment

| Variable                                                 | n=5760 |     | WFun score |      | WFun $\geq$ 21 |     | Model 1 |       |          | Model 2 |       |          |      |       |
|----------------------------------------------------------|--------|-----|------------|------|----------------|-----|---------|-------|----------|---------|-------|----------|------|-------|
|                                                          | n      | %   | Median     | IQR  | n              | %   | OR      | 95%CI | <i>p</i> | OR      | 95%CI | <i>p</i> |      |       |
| There is a place/room where I can concentrate            |        |     |            |      |                |     |         |       |          |         |       |          |      |       |
| No                                                       | 1367   | 24% | 14         | 7-22 | 426            | 31% | 1.71    | 1.49  | 1.96     | <0.01   | 1.65  | 1.43     | 1.91 | <0.01 |
| Yes                                                      | 4393   | 76% | 11         | 7-18 | 883            | 20% | ref     |       |          |         |       |          |      |       |
| There is enough light to do my work                      |        |     |            |      |                |     |         |       |          |         |       |          |      |       |
| No                                                       | 1019   | 18% | 15         | 7-22 | 358            | 35% | 2.13    | 1.84  | 2.47     | <0.01   | 2.02  | 1.73     | 2.35 | <0.01 |
| Yes                                                      | 4741   | 82% | 11         | 7-18 | 951            | 20% | ref     |       |          |         |       |          |      |       |
| There is enough space on my desk to work                 |        |     |            |      |                |     |         |       |          |         |       |          |      |       |
| No                                                       | 1661   | 29% | 14         | 7-21 | 506            | 30% | 1.79    | 1.57  | 2.04     | <0.01   | 1.69  | 1.47     | 1.93 | <0.01 |
| Yes                                                      | 4099   | 71% | 11         | 7-18 | 803            | 20% | ref     |       |          |         |       |          |      |       |
| There is enough space at my feet                         |        |     |            |      |                |     |         |       |          |         |       |          |      |       |
| No                                                       | 1244   | 22% | 15         | 7-22 | 425            | 34% | 2.09    | 1.82  | 2.40     | <0.01   | 1.98  | 1.71     | 2.28 | <0.01 |
| Yes                                                      | 4516   | 78% | 11         | 7-18 | 884            | 20% | ref     |       |          |         |       |          |      |       |
| The temperature and humidity in the room are comfortable |        |     |            |      |                |     |         |       |          |         |       |          |      |       |
| No                                                       | 1388   | 24% | 15         | 7-22 | 467            | 34% | 2.06    | 1.80  | 2.36     | <0.01   | 1.90  | 1.65     | 2.18 | <0.01 |
| Yes                                                      | 4372   | 76% | 11         | 7-18 | 842            | 19% | ref     |       |          |         |       |          |      |       |
| The environment is quiet                                 |        |     |            |      |                |     |         |       |          |         |       |          |      |       |
| No                                                       | 1246   | 22% | 14         | 7-22 | 408            | 33% | 1.87    | 1.62  | 2.15     | <0.01   | 1.76  | 1.52     | 2.03 | <0.01 |
| Yes                                                      | 4514   | 78% | 11         | 7-18 | 901            | 20% | ref     |       |          |         |       |          |      |       |
| I work at a desk/chair for office use                    |        |     |            |      |                |     |         |       |          |         |       |          |      |       |
| No                                                       | 2906   | 50% | 12         | 7-20 | 693            | 24% | ref     |       |          |         |       |          |      |       |
| Yes                                                      | 2854   | 50% | 11         | 7-19 | 616            | 22% | 0.91    | 0.80  | 1.03     | 0.15    | 0.93  | 0.82     | 1.06 | 0.27  |
| I work at a desk/chair not for office use                |        |     |            |      |                |     |         |       |          |         |       |          |      |       |
| No                                                       | 3231   | 56% | 12         | 7-19 | 689            | 21% | ref     |       |          |         |       |          |      |       |
| Yes                                                      | 2529   | 44% | 12         | 7-20 | 620            | 25% | 1.15    | 1.01  | 1.30     | 0.03    | 1.16  | 1.02     | 1.32 | 0.02  |
| I work at a coffee table or kotatsu                      |        |     |            |      |                |     |         |       |          |         |       |          |      |       |
| No                                                       | 4092   | 71% | 11         | 7-19 | 837            | 20% | ref     |       |          |         |       |          |      |       |
| Yes                                                      | 1668   | 29% | 13         | 7-21 | 472            | 28% | 1.45    | 1.27  | 1.66     | <0.01   | 1.39  | 1.21     | 1.59 | <0.01 |

Model 1: adjusted for sex, age

Model 2: adjusted for sex, age, education, marital status, job type, equivalent income, company size, frequency of working from home, change in working hours compared to pre-2019, commute time, and cumulative infection rate by prefecture

Table 3. Association between the number of nonconformities to recommendations for work environments while working from home and severe work functioning impairment

| Variable                                                           | n=5760 |     | WFun score |       | WFun ≥21 |     | Model 1 |           |          | Model 2 |           |          |  |
|--------------------------------------------------------------------|--------|-----|------------|-------|----------|-----|---------|-----------|----------|---------|-----------|----------|--|
|                                                                    | n      | %   | Median     | IQR   | n        | %   | OR      | 95%CI     | <i>p</i> | OR      | 95%CI     | <i>p</i> |  |
| Number of nonconformities to recommendations for work environments |        |     |            |       |          |     |         |           |          |         |           |          |  |
| 0                                                                  | 1177   | 20% | 8          | 7-14  | 159      | 14% | ref     |           |          |         | ref       |          |  |
| 1-2                                                                | 2808   | 49% | 11         | 7-18  | 562      | 20% | 1.50    | 1.24 1.82 | <0.01    | 1.44    | 1.18 1.75 | <0.01    |  |
| 3-4                                                                | 1084   | 19% | 14         | 7-21  | 312      | 29% | 2.38    | 1.91 2.95 | <0.01    | 2.18    | 1.75 2.72 | <0.01    |  |
| 5-6                                                                | 598    | 10% | 16         | 7-23  | 232      | 39% | 3.79    | 2.98 4.80 | <0.01    | 3.46    | 2.71 4.42 | <0.01    |  |
| 7                                                                  | 93     | 2%  | 20         | 11-27 | 44       | 47% | 5.31    | 3.40 8.28 | <0.01    | 4.51    | 2.86 7.11 | <0.01    |  |

Model 1: adjusted for sex, age

Model 2: adjusted for sex, age, education, marital status, job type, equivalent income, company size, frequency of working from home, change in working hours compared to pre-2019, commute time, and cumulative infection rate by prefecture
